# Supplementary material for: A self-healable polyvinyl alcohol-based hydrogel electrolyte for smart electrochemical capacitors
Source: Royal Society of Chemistry journal article supplement (doi:10.1039/c6ta08018a), 2016-01-01
Supplement: c6ta08018a1.pdf [file c6ta08018a1.pdf]

## Electronic Supplementary Information

### Self-healable polyvinyl alcohol-based hydrogel electrolyte for smart electrochemical capacitors

Zhikui Wang, Feng Tao, Qinmin Pan\*

(State Key Laboratory of Robotics and Systems, School of Chemistry and Chemical Engineering, Harbin Institute  
of Technology, Harbin 150001, *P. R.* China)

Corresponding author:

**Qinmin Pan**

Harbin Institute of Technology, Harbin 150001, *P. R.* China

E-mail: [panqm@hit.edu.cn](mailto:panqm@hit.edu.cn)

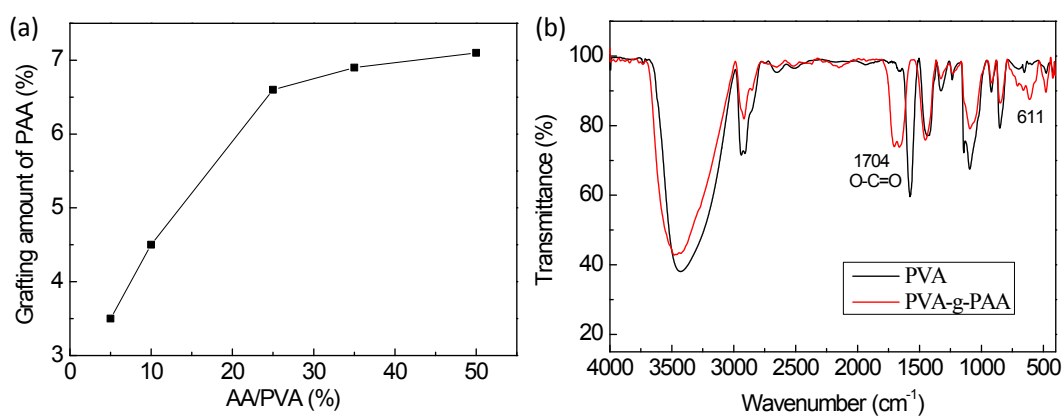

Fig. S1. (a) Dependence of grafting amount of PAA on the molar ratio of acrylic acid to PVA. (b) FT-IR spectra of the PVA and PVA-g-PAA.

Fig. S1b is the FT-IR spectra of PVA and PVA-g-PAA. Compared with that of PVA, a peak near 1704 cm<sup>-1</sup> is observed for PVA-g-PAA, which can be ascribed to C=O stretching vibration of PAA. In addition, the peak at 611 cm<sup>-1</sup> is strengthened after the grafting reaction, indicating the presence of O-H out-plane vibration of the carboxylic group.<sup>1,2</sup> The results suggest that polyacrylic acid is grafted to PVA.

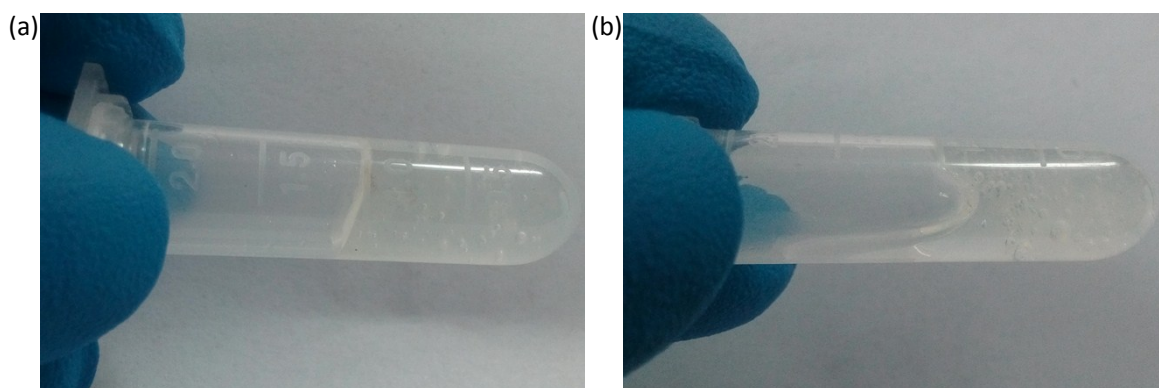

Fig. S2. Photos of the PVA-g-PAA/KCl hydrogel electrolyte prepared from 5.0 mM borax, (a) fresh electrolyte, (b) after storage for 5 h.

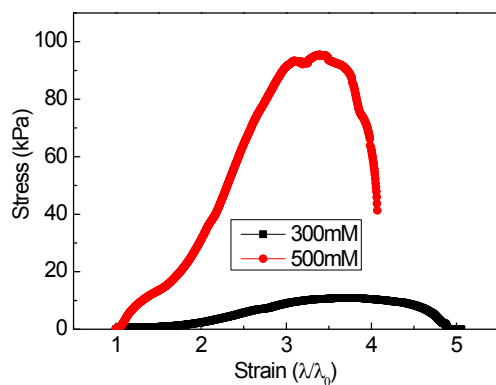

Fig. S3. Stress-strain curves of the PVA-g-PAA hydrogel electrolytes with 300 mM and 500 mM KCl.

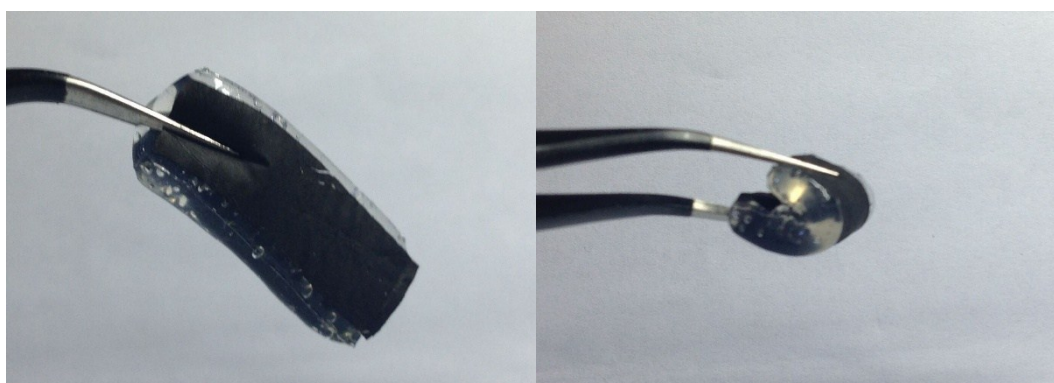

Fig. S4. The capacitor could be easily bended by tweezers.

Table S1. Ionic conductivity of the reported PVA-based electrolytes for electrochemical capacitors

| PVA-based electrolytes                                                   | Ionic conductivity /<br>mS cm <sup>-1</sup> | References |
|--------------------------------------------------------------------------|---------------------------------------------|------------|
| PVA/potassium borate/KCl                                                 | 1.02                                        | 3          |
| PVA/1-butyl-3-methylimidazolium chloride/Li <sub>2</sub> SO <sub>4</sub> | 37                                          | 4          |
| PVA/H <sub>2</sub> SO <sub>4</sub>                                       | 82                                          | 5          |
| PVA/KOH                                                                  | ~10                                         | 6          |
| PVA/KOH/K <sub>3</sub> [Fe(CN) <sub>6</sub> ]                            | 45.6                                        | 7          |
| PVA/poly(epichlorohydrin)/KOH                                            | 1-10                                        | 8          |
| Cross-linked PVA/H <sub>2</sub> SO <sub>4</sub>                          | 24.9                                        | 9          |
| PVA/H <sub>3</sub> PO <sub>4</sub>                                       | 3.4                                         | 10         |
| GO/Boron/PVA/KOH                                                         | 195                                         | 11         |
| PVA/H <sub>2</sub> SO <sub>4</sub> / <i>p</i> -benzenediol               | 34.8                                        | 12         |
| PVA/KOH/KI                                                               | 12.73                                       | 13         |
| PVA/PVP/KOH                                                              | 530                                         | 14         |
| PEO/PVA/KOH                                                              | 10                                          | 15         |

Table S2. Change of  $R_s$  and  $R_{ct}$  of the capacitor before and after self-healing.

|                                    | $R_s / \Omega$ | $R_{ct} / \Omega$ |
|------------------------------------|----------------|-------------------|
| Before cut                         | 1.85           | 13.55             |
| After the 1 <sup>st</sup> healing  | 1.95           | 13.76             |
| After the 5 <sup>th</sup> healing  | 1.95           | 13.95             |
| After the 10 <sup>th</sup> healing | 1.94           | 14.27             |

## References

- [1] D. S. Shehap, S. A. Dana, *Int. J. Nanoelectronics and Materials* 2016, **9**, 17–36.
- [2] K. Bajpai, *eXPRESS Polymer Letters* 2008, **2**, 26–39.
- [3] M. Jiang, J. Zhu, C. Chen, Y. Lu, Y. Ge, X. Zhang, *ACS Appl. Mater. Interfaces* 2016, **8**, 3473–3481.
- [4] X. Zhang, L. Wang, J. Peng, P. Cao, X. Cai, J. Li, M. Zhai, *Adv. Mater. Interfaces* 2015, **2**, 1500267.
- [5] K. Wang, X. Zhang, C. Li, X. Sun, Q. Meng, Y. Ma, Z. Wei, *Adv. Mater.* 2015, **27**, 7451–7457.
- [6] Yang, S. Hsu, W. Chien, *J. Power Sources* 2005, **152**, 303–310.
- [7] G. Ma, J. Li, K. Sun, H. Peng, J. Mu, Z. Lei, *J. Power Sources* 2014, **256**, 281–287.
- [8] Yang, S. Lin, S. Hsu, *J. Power Sources* 2003, **122**, 210–218.
- [9] H. Fei, C. Yang, H. Bao, G. Wang, *J. Power Sources* 2014, **266**, 488–495.
- [10] Zhao, C. Wang, Z. Yue, K. Shu, G. G. Wallace, *ACS Appl. Mater. Interfaces* 2013, **5**, 9008–9014.
- [11] Y. Huang, P. Wu, M. Zhang, W. Ruan, E. P. Giannelis, *Electrochim. Acta* 2014, **132**, 103–111.
- [12] H. Yu, J. Wu, L. Fan, Y. Lin, K. Xu, Z. Tang, C. Cheng, S. Tang, J. Lin, M. Huang, Z. Lan, *J. Power Sources* 2012, **198**, 402–407.
- [13] H. Yu, J. Wu, L. Fan, K. Xu, X. Zhong, Y. Lin, J. Lin, *Electrochim. Acta* 2011, **56**, 6881–6886.
- [14] J. Qiao, J. Fu, R. Lin, J. Ma, J. Liu, *Polymer* 2010, **51**, 4850–4859.
- [15] Yang, S. Lin, *J. Power Sources* 2002, **112**, 497–503.
